# Supplementary material for: Immunogenomic engineering of a plug-and-(dis)play hybridoma platform
Source: PubMed Central journal article supplement (PMC4992066; doi:10.1038/ncomms12535), 2016-08-17
Supplement: ncomms12535-s1.pdf [file ncomms12535-s1.pdf]

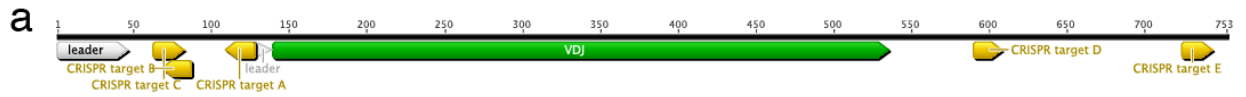

Leader peptide  
 Antibody variable region  
 CRISPR gRNA target site  
 PAM

**Nucleotide sequence**

ATGGAATGGCCTTGATCTTTCTCCTCCTCCTGTCAGTCACTGAAGGTAAGGAACTCAGCAGTTCCAATCTGAAGAGGAGATAGGGCCT  
 GAGGTGACAATGACATCCAACAATTTCTTTCTCCCGACAGGTGTCCACTCCAGGTTTCAGCTGCAGCAGTCTGGACCTGAGCTGGTGAA  
 GCCTGGGGCCTCAGTGAAGATTTCTGCAAGGCTTCTGGCTACGCATTAGTAACCTCTGGATGAAGTGGTGAAGCAGAGGCGCTG  
 GAAAGGGTCTTGAGTGGATTGGACGGATTTATCCTGGAGATGGAGATACTAACTACAATGGGAAGTTCAGGGGCAAGGCCACTG  
 ACTGCAGACAAATCCTCAGCACAGCCTACATACTCAGCAGCCTGACATCTGAGGACTCTGCGGTCTACTTCTGCGCAAGAAAT  
 ATCGTTGGTGAAGGTCTCTACTATGATTACGACGGGGGGAACTTTTTGACTATACTGTGACTGCTGGGGTCAAGGAACCTCAGTC  
 ACCGTCCTCTCAGGTATGAATGGCCTCCTCAGGTCTTTACTTTTACCTTTCTTATGGGGTTTTCTGAGCATGAOCGGACTAATCTTGGATATTT  
 GTCCCTGAGGGAGCCGGCTGAGAAAAATGGTAAATAAAGTGTCTAGGGATCTCTGAGCCTTTAGGACAGATTATCTCCACATCTTTGAAAAA  
 CTAAGAGTCTGTGTGTTGGTTTAGCGGAGTCCCTGGATGATGG

**Translated ORF**

MEWPCIFLLLLSVTEGVHSQVQLQDSPELVKPGASVKISCKASGYAFNSWMMNWVKQRPGKLEWIGRIYPGDGDNTNYNGKFRGKATL  
 TADKSFSTAYIQLSSLTSEDSAVYFCARNIVGEGLYYDYDGGELFDYTVDCWGGQTSVTSS

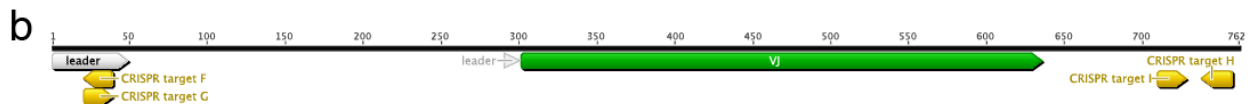

Leader peptide  
 Antibody variable region  
 CRISPR gRNA target site  
 PAM

ATGGAGAAAGACACACTCCIGCTATGGGTCCTGCTTCTCTGGGTTCCAGGTGAGGATGCAGAGAAGTGTGAGAGCAACCTCTGTAG  
 CCATCATGACTTTCCATGTTTCTGGATTCTTGATCATTATACTTAGGGTATTTGTCATTGGTTTTAAGATTCCCTCAGTCCCCTGGATTTTCT  
 GGTTTCTCAGAGTGATATCCACAGTCATTCTTAAATTTTAAACTGAGAGGTCTCTGCTGGGAAGGTATGCCACATACATGACAATAG  
 CCTGTGTGTTTCTCATTCCAGGTTCCACAGGTGACATTGTGCTGACCCAATCTCCAGCTTCTTTGGCTGTGTCTCTAGGGCAGAGGG  
 CCACCATCTCCTGCAGAGCCAGCGAGAGTGTATAATTATGGCTTTAGTTTTATGAGCTGGTTCCAACAAAACCAGGACAGCCAC  
 CCAAGCTCCTCATCTATGTTGCATCCAACCAAGGATCCGGGGTCCCTGCCAGGTTTAGTGGCAGTGGGTCTGGGACAGACTTCAGC  
 CTC AACATCCATCTGTGGAGGAGGATGATACTGCAATGTATTCTGTCAACAACTAAGGAGTTCCATTACGTTCCGGCTCGGGG  
 ACAAAGTTGAAATAAAACGTAAGTAGACTTTTGCTCATTACTTGTGACGTTTTGGTCTGTTGGGTAACCTGTGTGAATTTGTGACA  
 TTTTGGCTAAATGAGCCATTCTTGGCAACCCTGTGCATCAATAGAAGATCCCCAGAG

**Translated ORF**

MEKDTLLLWVLLWVPGSTGDIVLTQSPASLAVSLGQRATISCRASESVYNYGFSFMSWFQKPGQPPKLLIYVSNQSGVPARFSGSG  
 SGTDFSLNIHPVEEDTAMYFCQQTKVFPFTFGSGTKLEIK

**Supplementary Fig. 1. Annotated genomic sequence of immunoglobulin loci in WT hybridoma cells. (a) Genomic sequence of the IgH locus. (b) Genomic sequence of the IgK locus. Translated ORF were predicted from the gDNA and cDNA sequences. CRISPR gRNA target sites were independently tested (see Supplementary Fig. 2).**

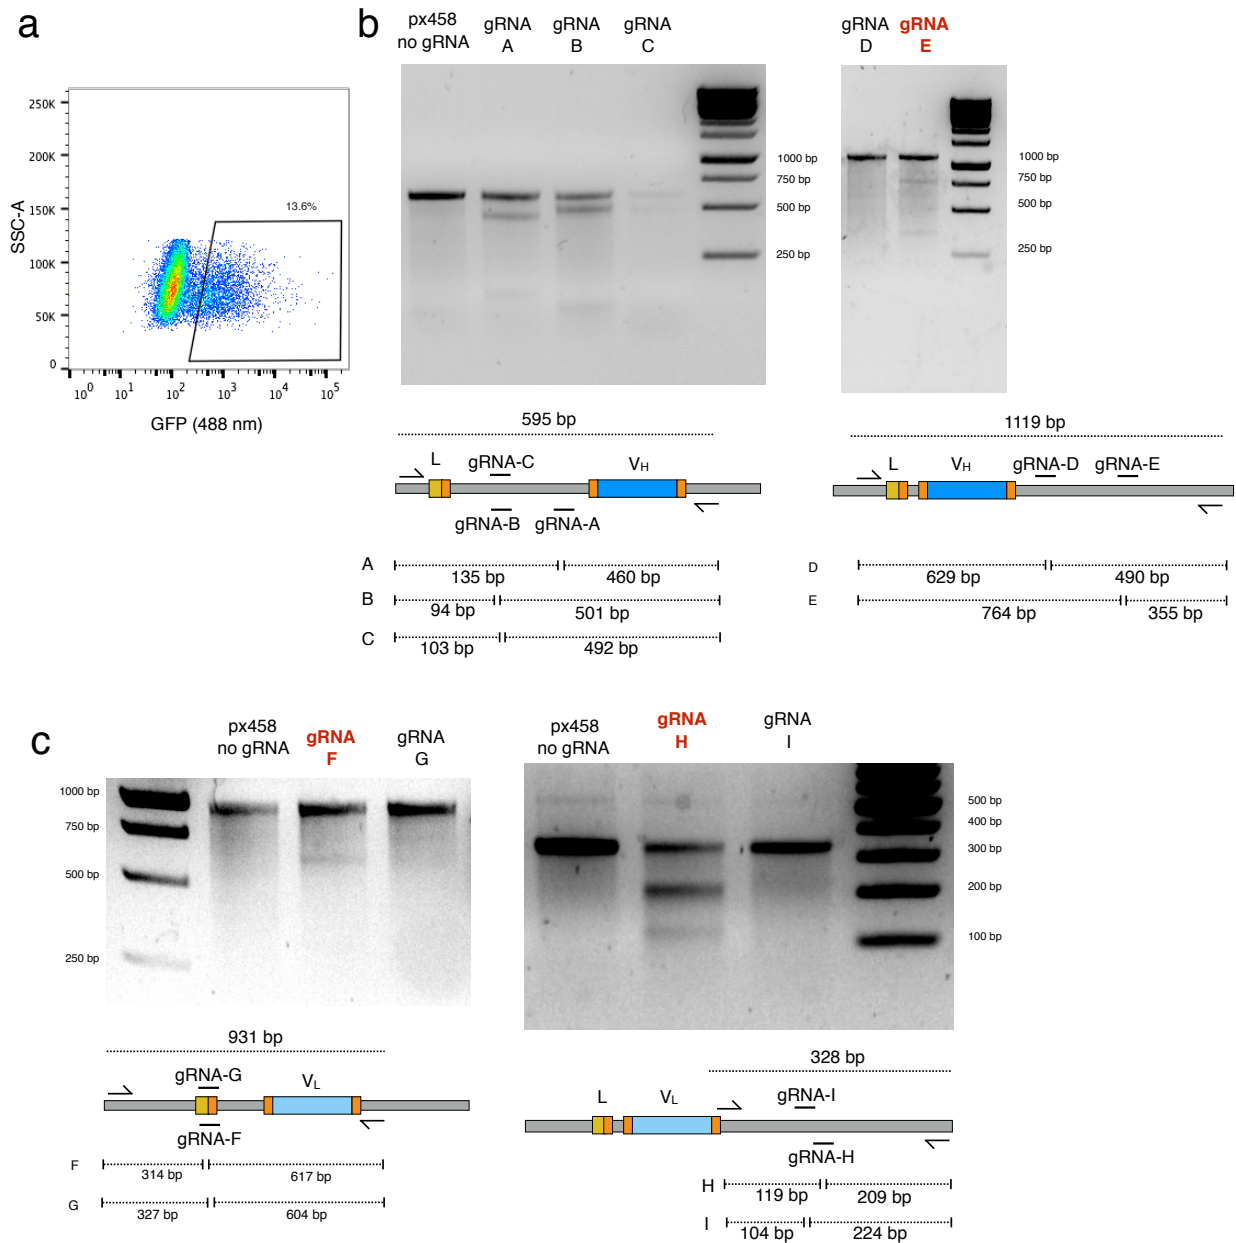

**Supplementary Fig. 2. Validation of CRISPR-Cas9 targeting of immunoglobulin loci in WT hybridoma cells.** (a) Flow cytometry dot plot shows expression of Cas9 (via 2A-GFP) in WT cells following transfection with pX458. (b, c) Surveyor results validate CRISPR-Cas9 targeting in IgH and IgK loci, respectively (agarose gels of all gRNA sites tested). The gRNAs selected for further experiments are in red text.

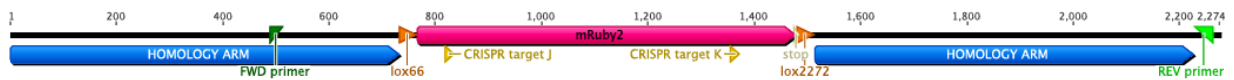

**mRuby2 gene**

Homology Arm

CRISPR gRNA target site

PAM

LoxP sites

Forward sequencing primer

Reverse sequencing primer

lowercase is external to genomic region

**Nucleotide sequence**

AGTTATATCTAATCCATTCATTTTTCCAGAATCAGTGTAAATTTCTGGTAAAAATCATTATTTGAAATCTAGTACTAGTGATAAAATCCTTTGTG  
ACACATCTATAGTTTATATCTATAATTAGTTAATCATGGTATTGGTGAATAATCACTGATGTGTAATATACATGTACTTTATCCATTTAGTGAATT  
TTGAAGTACATAACCTGTGGTAAAGGCAAAATATTACTTGAACGTATCTAAAGAAGGTTCTAATATCTAAAGTTAGCCACTTTTGAATTTACCAT  
CAGATCATCATCATCATCATCATCATCATCATCATCATCATCATCATCATCATCATCATCATCATCATCATCATCATCATCATCATCATCATCATCAT  
GTGGAGCAGCAGACTCAGGCCAAAAATTTATTGAGAAGTCTGCTGCTGCTGCTGCTGCTGCTGCTGCTGCTGCTGCTGCTGCTGCTGCTGCTGCT  
TGGGATGCTTTTCCAGGGAGGATTATGACTTTGGACCCCTAGCATCTGCTGCATGACCCATGTGCCCTTTTCAGTGCTTTCTCCCTAGTTCT  
TCTCCAGCTGGACTAGGTCATTAAGTAAAGAAATGCACTGCTCATGAATATGCAAATTAAGTCTGAGCCTATGGTAGTAAATACAGGCATGCCACA  
CTGTGAAAACAACATATGACTCCTGCTCTTCTCCACAGTCCCAGAACACACTCACTCTAACCATAACTTCGTATAATGTATGCTATACGAAACG  
GTAATGGTGTCTAAGGGCGAAGAGCTGATCAAGGAAAATATGCGTATGAAGGTGTGTCATGGAAGGTTTCGGTCAACGGCCACCAATTC  
AAATGCACAGGTGAAGGAGAAGGCAATCCGTACATGGGAATCAAAACCATGAGGATCAAAGTCAATCGAGGGAGGACCCTGCCATT  
TGCCTTTGACATTCCTGGCCAGCTCGTTTCATGTATGGCAGCCGTAATTTTATCAAGTACCCGAAAGGCATTCTGATTTCTTTAAACAGTC  
CTTTCCTGAGGGTTTTACTTGGGAAAGAGTTACGAGATACGAAGATGGTGGAGTCTCACCGTCAATGCAGGACACCAGCCTTGAGGA  
TGGCTGTCTCGTTTACCAGTCCAAGTCAAGAGGGGTAACCTTCCCTCCAATGGTCCCGTATGCAGAGAAGACCAAGGGTTGGGA  
GCCTAATACAGAGATGATGTATCCAGCAGATGGTGGTCTGAGGGGATACACTCATATGGCCTGAAAGTTGATGGTGGTGGCCATCTG  
TCTTGCTCTTTCGTAACAACCTACAGGTCAAAAAAGACCGTCCGGAAACATCAAGATGCCCGGTATCCATGCGCGTTGATCACCGCCTGG  
AAAGGTTAGAGGAAAGTGACAATGAAATGTTTCGTAGTACAACCGCAACACGCAGTTGCCAAGTTCCCGGGCTTGGTGGTGGGATG  
GACGAGCTGTACAAGTGAATAACTTCGTATAAAGTATCCTATACGAAGTTATCACCGTCTCCTCAGGTAAGAATGGCCTCTCCAGGTCTT  
TATTTTAAACCTTTGTTATGGAGTTTTCTGAGCATTGCAGACTAATCTGGATATTTGCTCCTGAGGGAGCCGGCTGAGAGAAGTTGGGAAATA  
AACTGTCTAGGGATCTCAGAGCCTTAGGACAGATTATCTCCACATCTTTGAAAACTAAGAATCTGTGTGATGGTGGTGGTGGAGTCCCTGG  
ATGATGGGATAGGGACTTTGGAGGCTCATTGAAGAAGATGCTAAAACAATCCTATGGCTGGAGGGATAGTTGGGGCTGTAGTTGGAGATTT  
CAGTTTTTAGAATAAAGTATTAGTTGTGGAATATACTCAGGACCCTCTGTGACAGCATTATACAGTATCCGATGCATAGGGACAAAAGAGT  
GGAGTGGGGCACTTTCTTAGATTTGTGAGGAATGTTCCGCACTAGATTGTTAAAATTCATTTGTTGGAAGGAGAGCTGTCTTAGTGATTGA  
GTCAAGGGAGAAAGGCATCTAGCCTCGGTCTCAAAGGGTAGTTGCTGTCTAGAGAGGCTGCTGGAGCCTGCAAAAGTCCAGCTTTCAA  
AGGAACACAGAAGTATGTGTATGGAATATTAGAAGATGTTGCTTTACTCTTAAGTTGGTTCCTAGGAAAAATAGTAAATACTGTGACTTTAAAA  
TGTGAGAGGGTTTTCAAgtactcattttttaaatgtccaaaattctgtcaatca

**mRuby2 coding sequence**

MVSKGEELIKENMRMKVMEGSVNGHQFKCTGEGEGNPYMGQTMRKIVIEGGPLPFAFDILATSFMYGSRFTFIKYPKGPIDFFKQSFPEG  
FTWERVTRYEDGGVVTVMQDTSLEDGCLVYHVQVRGVNFPNSNGPVMQKKTGWEPNTEMMYPADGGLRGYTHMALKVDGGGHLSCSF  
VTTYRSKKTGVNPKMPIHVDHRLERLEESDNEMFVQREHAVAKFAGLGGGMDELYK

**Supplementary Fig. 3. Annotated sequence of PnP-mRuby locus.** PCR performed on genomic DNA from PnP-mRuby cells (clone 1E9.C3, see **Supplementary Table 1**) followed by Sanger sequencing (directly on PCR product or following bacterial cloning) verified matching to reference sequence from nucleotide position 489 to 2264. CRISPR gRNA target sites were independently tested (see **Supplementary Fig. 6**).

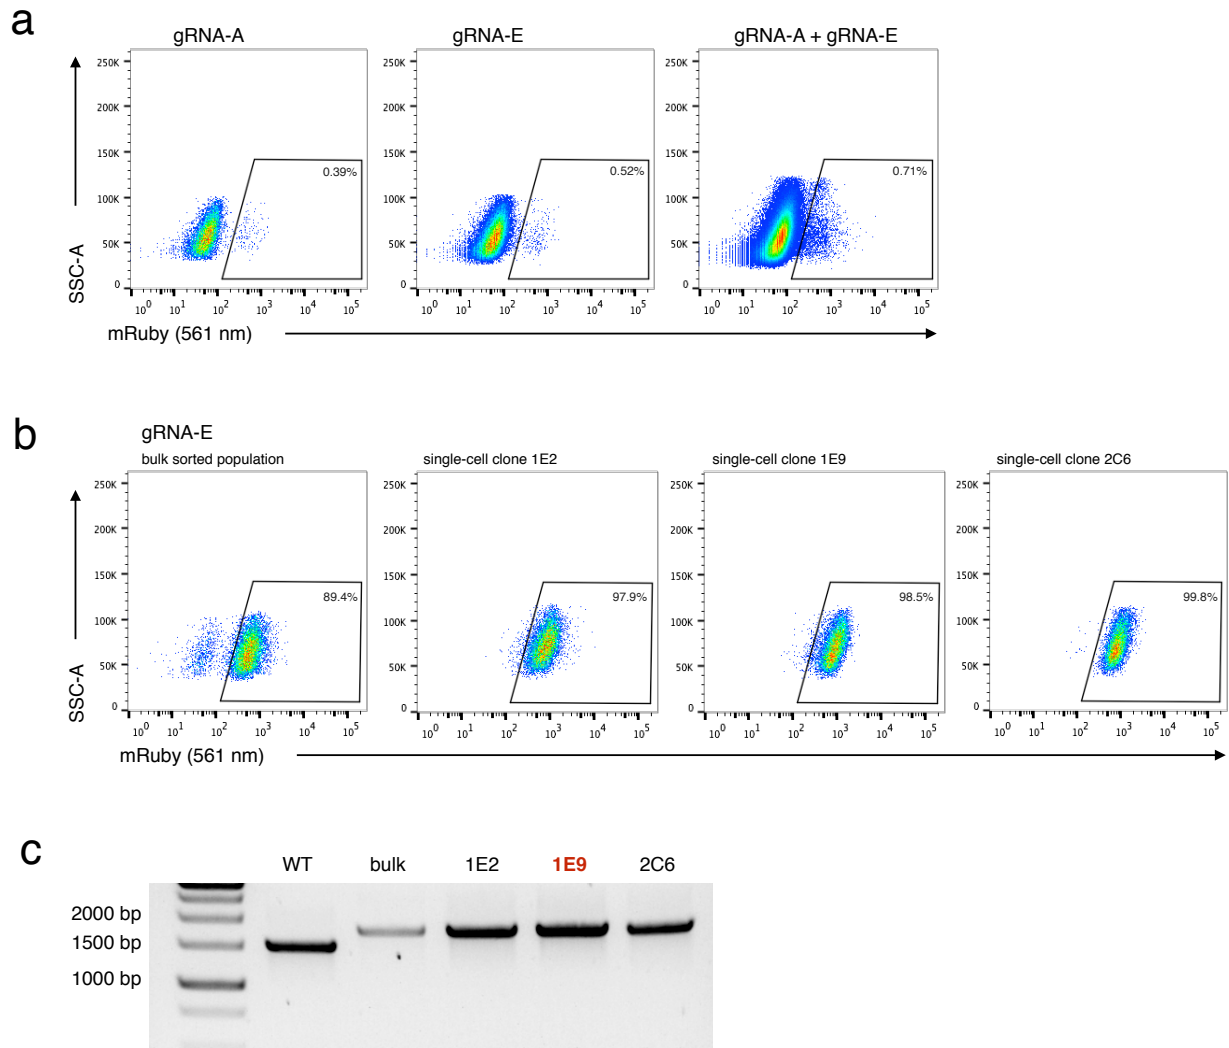

**Supplementary Fig. 4. Generation and characterization of PnP-mRuby clones.** (a) Flow cytometry dot plots following transfection WT cells with pX458 (with different gRNAs) and mRuby donor construct (linear). Data is before sorting for mRuby expression. (b) Flow cytometry dot plots after sorting for mRuby expression in different samples, before (bulk sorted population) or after the final single-cell sorting step. (c) DNA agarose gels of PCR on genomic DNA using the same primers shown in Fig. 1d. Clone 1E9 was selected for further experiments.

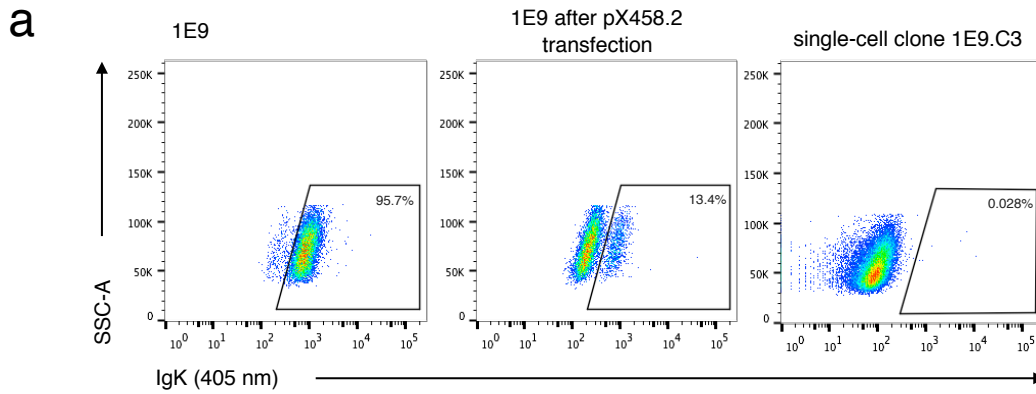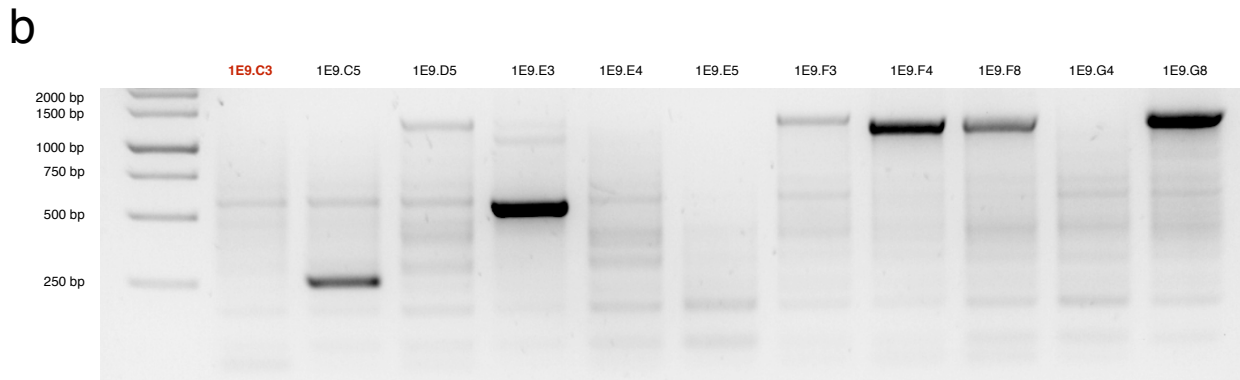

**Supplementary Fig. 5. Characterization of PnP-mRuby cells with deletion of  $V_L$ .** (a) Left panel, flow cytometry dot plot shows IgK expression is still present in clone 1E9 (mRuby integrated in IgH locus). Middle panel shows 1E9 cells following transfection with pX458 with gRNAs targeting  $V_L$ . Right panel shows single-cell isolated clone 1E9.C3 with nearly all IgK expression knocked out. (b) DNA agarose gel of PCRs from single-cell sorted populations from middle panel of (A). Primers used for PCR are the same shown in Fig. 1g.

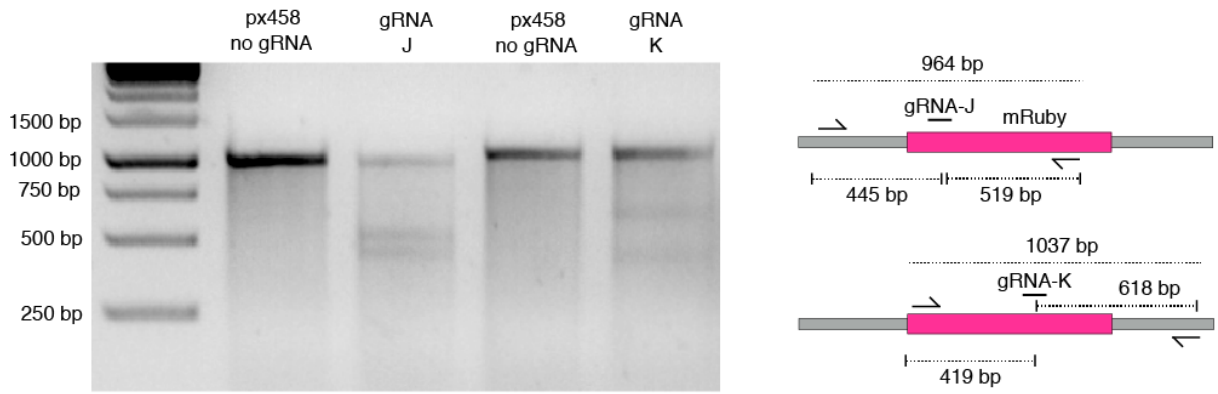

**Supplementary Fig. 6. Validation of CRISPR-Cas9 targeting in mRuby gene.** Surveyor assays following transfection of PnP-mRuby cells (clone 1E9.C3) with pX458.2 and gRNAs targeting the mRuby gene.





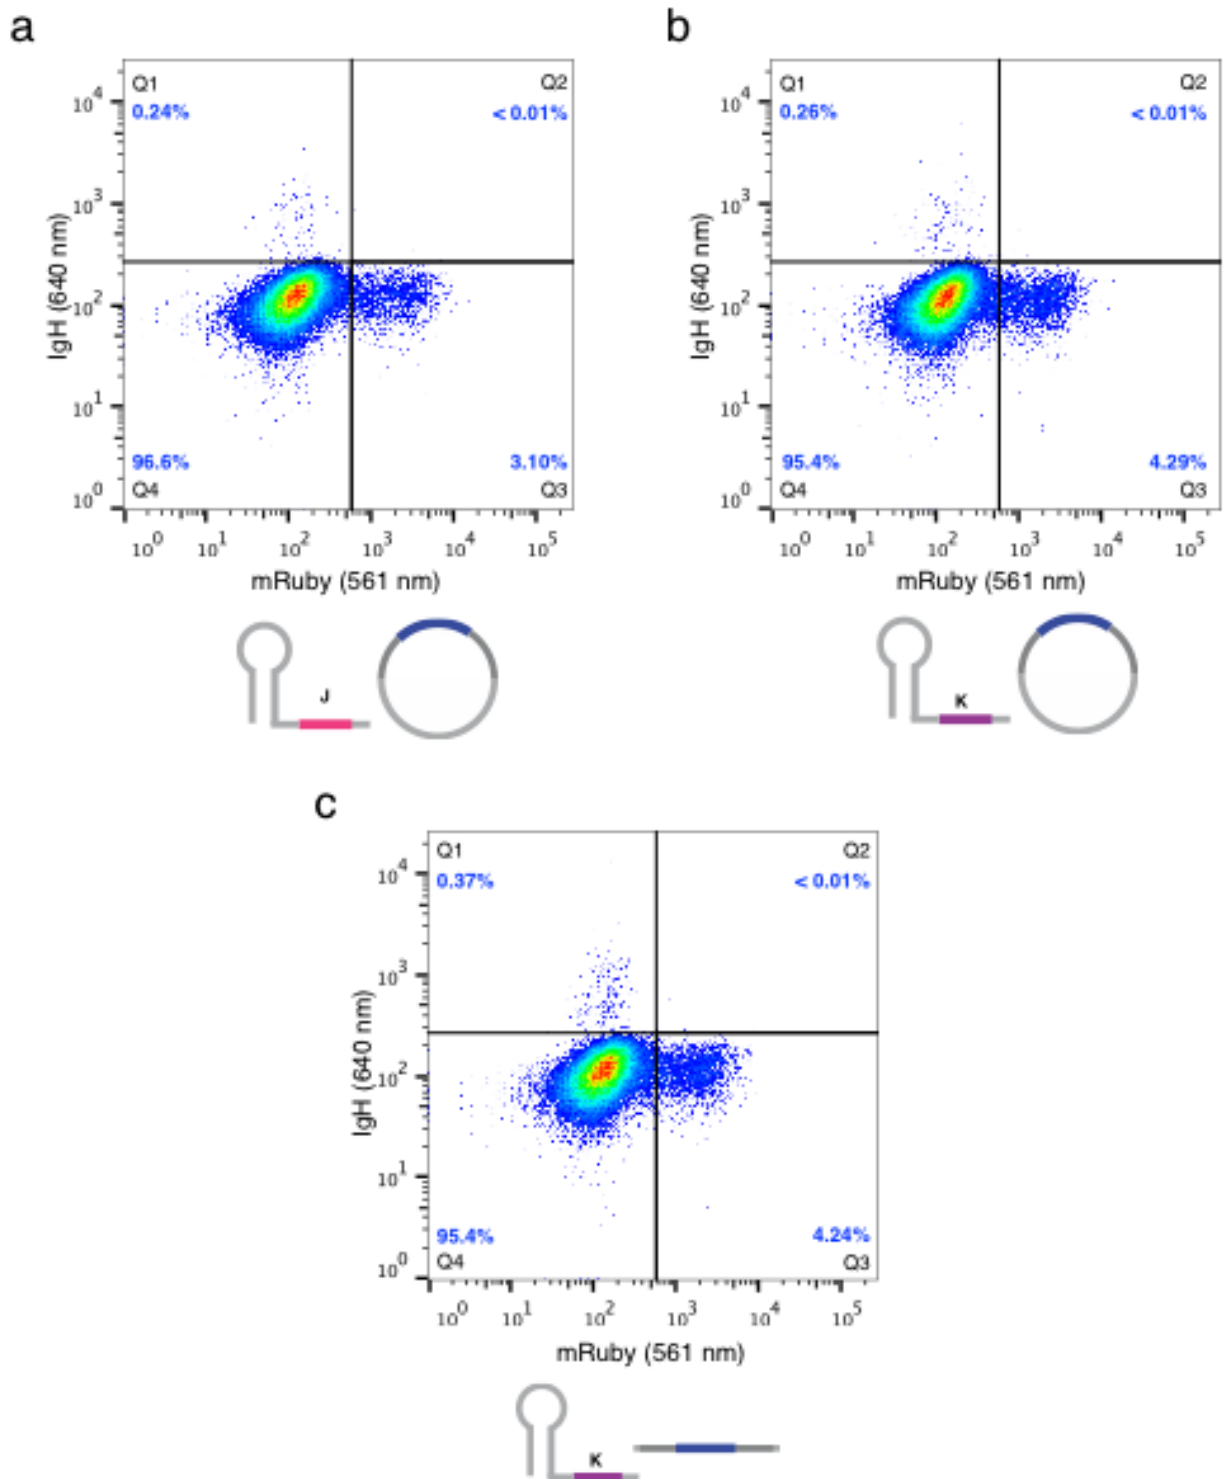

**Supplementary Fig. 8. Evaluation of gRNA and HDR donor formats for generation of PnP-HEL23 cells.** Different gRNAs and HDR donor formats were evaluated for the generation PnP-HEL23 cell lines. Flow cytometry dot plots correspond to the pre-IgH sorting phase, analogous to **Fig. 2d**, which displays the format with highest efficiency (gRNA-J, linear HDR donor). **(a)** gRNA-J, plasmid HDR donor. **(b)** gRNA-K, plasmid HDR donor. **(c)** gRNA-K, linear HDR donor.



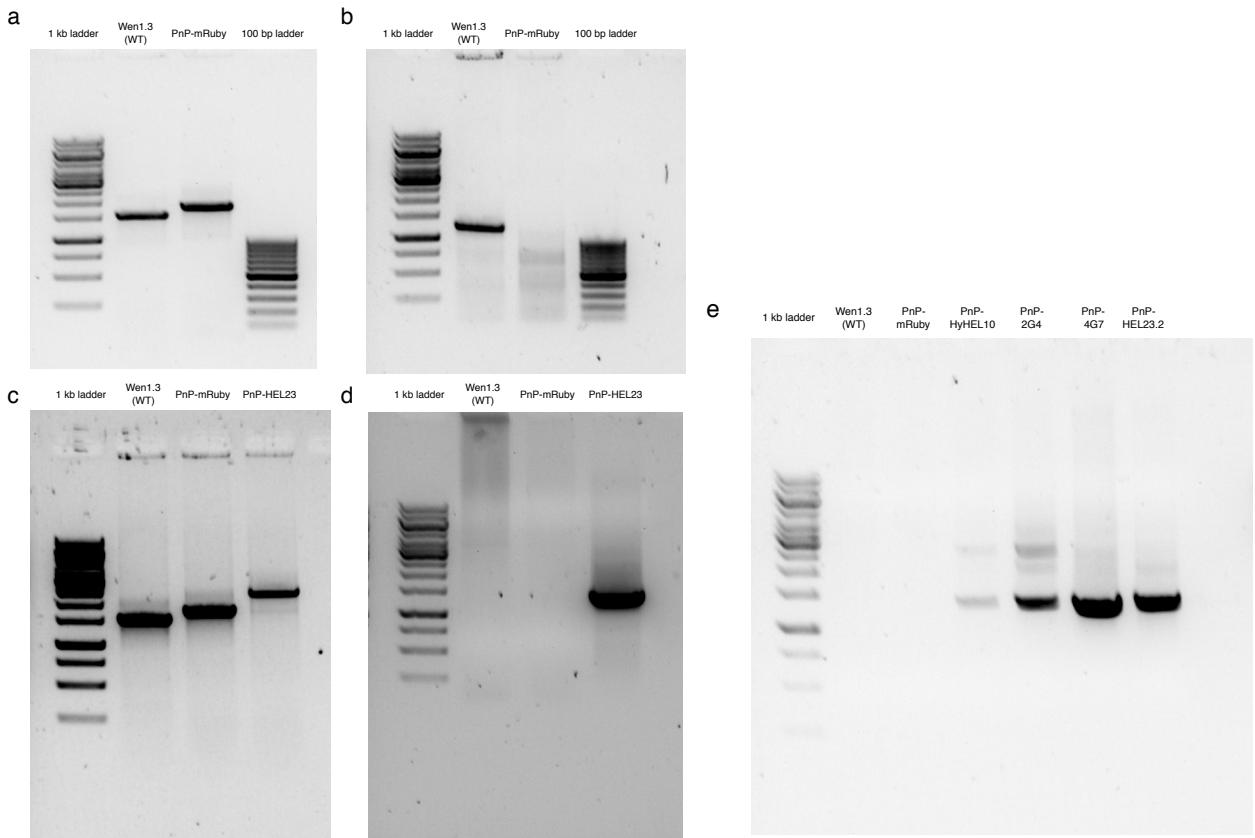

**Supplementary Fig. 9. Uncropped DNA agarose gel pictures.** (a) Genomic  $V_H$  locus from WT hybridoma and engineered PnP-mRuby cell line (ref.: **Fig. 1d**). (b) Genomic  $V_L$  locus from WT hybridoma and engineered PnP-mRuby cell line (ref.: **Fig. 1g**). (c) Genomic  $V_H$  locus from WT hybridoma, PnP-mRuby and PnP-HEL23 reprogrammed cell lines (ref.: **Fig. 2g**). (d) Spliced HEL23 synthetic antibody (sAb) amplified by RT-PCR (ref.: **Fig. 2h**). (e) Spliced HyHEL10, 2G4, 4G7 and HEL23.2 sAbs amplified by RT-PCR (ref.: **Fig. 4f**).

**Table S1. Summary of hybridoma clones used and generated in this study.**

| Cell Name   | Cell line clone | Description                                                                                                                                                                                                                                                                                                                                                                                                                                                                                                                                                            |
|-------------|-----------------|------------------------------------------------------------------------------------------------------------------------------------------------------------------------------------------------------------------------------------------------------------------------------------------------------------------------------------------------------------------------------------------------------------------------------------------------------------------------------------------------------------------------------------------------------------------------|
| WT          | WEN1.3          | WEN1.3 cells are derived from a mouse infected with LCMV. They express IgG2c and are specific for LCMV GP-1 antigen. Their IgH and IgK loci were sequenced and annotated (as shown in Fig. S1)                                                                                                                                                                                                                                                                                                                                                                         |
| PnP-mRuby   | 1E9.C3          | WEN1.3 cells were transfected with pX458 with gRNA-E and mRuby donor construct and sorted for Cas9 positive expression (2A-GFP). This was followed by a first round of sorting for mRuby-positive cells, followed by a second single-cell sort for mRuby. A single-cell clone was selected and then transfected with pX458 with gRNA-F and H and sorted for Cas9 positive expression (2A-GFP). Cells were single-cell sorted for IgK negative expression, followed by genomic PCR to identify a clone with V <sub>L</sub> deletion. This final clone represents 1E9.C3 |
| PnP-HEL23   | Y               | Clone 1E9.C3 was transfected with pX458.2 with gRNA-J and HEL23 sAb donor (linearized). Cells were sorted for Cas9 positive expression (2A-BFP) and expanded. Cells were then sorted for surface IgH expression and expanded, and finally characterized for IgH and IgK expression.                                                                                                                                                                                                                                                                                    |
| PnP-HyHEL10 | U               | Clone 1E9.C3 was transfected with pX458.2 with gRNA-J and HyHEL10 sAb donor (linearized). Cells were sorted for Cas9 positive expression (2A-BFP) and expanded. Cells were then sorted for surface IgH expression and expanded, and then they underwent a second IgH sort. They were finally characterized for IgH and IgK expression.                                                                                                                                                                                                                                 |
| PnP-2G4     | AA              | Clone 1E9.C3 was transfected with pX458.2 with gRNA-J and 2G4 sAb donor (linearized). Cells were sorted for Cas9 positive expression (2A-BFP) and expanded. Cells were then sorted for surface IgH expression and expanded, and then they underwent a third sort for IgH and IgK expression. They were finally characterized for IgH and IgK expression.                                                                                                                                                                                                               |
| PnP-4G7     | AB              | Clone 1E9.C3 was transfected with pX458.2 with gRNA-J and 4G7 sAb donor (linearized). Cells were sorted for Cas9 positive expression (2A-BFP) and expanded. Cells were then sorted for surface IgH expression and expanded, and then they underwent a third sort for IgH and IgK expression. They were finally characterized for IgH and IgK expression.                                                                                                                                                                                                               |
| PnP-HEL23.2 | AC              | Clone 1E9.C3 was transfected with pX458.2 with gRNA-J and HEL23 sAb donor (linearized). Cells were <b>not</b> sorted for Cas9 positive expression. They were sorted only once for surface IgH expression and expanded. They were finally characterized for IgH and IgK expression.                                                                                                                                                                                                                                                                                     |

**Table S2. List of all gRNAs used in this study.**

| <b>gRNA ID</b> | <b>Target region</b>        | <b>gRNA (oligonucleotide)</b> | <b>Resident plasmid</b> |
|----------------|-----------------------------|-------------------------------|-------------------------|
| gRNA-A         | WEN1.3 leader-VH intron     | GCTGTCGGGAGAAAGAAATTG         | pX458                   |
| gRNA-B         | WEN1.3 leader-VH intron     | GCCCTATCTCCTCTTCAGAT          | pX458                   |
| gRNA-C         | WEN1.3 leader-VH intron     | GTTCCAATCTGAAGAGGAGAT         | pX458                   |
| gRNA-D         | WEN1.3 JH downstream intron | GGAGCATGACGGACTAATCT          | pX458                   |
| gRNA-E         | WEN1.3 JH downstream intron | GTTGGTTTTAGCGGAGTCCC          | pX458                   |
| gRNA-F         | WEN1.3 VK leader            | GGAGAAGCAGGACCCATAGC          | pX458                   |
| gRNA-G         | WEN1.3 VK leader            | GGCTATGGGTCCTGCTTCTC          | pX458                   |
| gRNA-H         | WEN1.3 JK downstream intron | GGGATCTTCTATTGATGCAC          | pX458                   |
| gRNA-I         | WEN1.3 JK downstream intron | GTGGCTAAATGAGCCATTCC          | pX458                   |
| gRNA-J         | mRuby2                      | GTCATGGAAGGTTCCGGTCAA         | pX458.2 (BFP)           |
| gRNA-K         | mRuby2                      | GCATGCCGTTGATCACCGCC          | pX458.2 (BFP)           |

**Table S3. Flow cytometry labeling reagents with their working concentrations.**

| Target antigen   | Working concentration | Dilution from stock | Incubation volume | Fluorophore           | Product ID                           |
|------------------|-----------------------|---------------------|-------------------|-----------------------|--------------------------------------|
| IgG2C            | 3.3 µg/ml             | 1:150               | 100 µl            | Allophycocyanin (APC) | 115-135-208 (Jackson ImmunoResearch) |
| IgK              | 2.5 µg/ml             | 1:80                | 100 µl            | Brilliant Violet 421™ | 409511 (BioLegend)                   |
| Hen egg lysozyme | 0.99 µg/ml            | 1:62.5              | 100 µl            | AlexaFluor® 647       | 62971-10G-F (Sigma-Aldrich)          |

Lysozyme from hen egg white was labeled in-house with the AlexaFluor® 647 Protein labeling kit (Molecular Probes™, Thermo Fisher Scientific, A-20173). A stock solution concentrated 61.8 µg/ml was used for dilution.

**Table S4. Genotyping primers.**

| Primer name           | Amplified region                          | Sequence                                  |
|-----------------------|-------------------------------------------|-------------------------------------------|
| IgH-promoter-for      | IgH locus (gDNA)                          | 5'-GATGCTTTTCCTCAGGGAGGATTATG-3'          |
| IgH-ext-rev           | IgH locus (gDNA)                          | 5'-TGATTGACAAGAATTTTGGACATTTAAAAAATGAG-3' |
| IgK-upstream-for      | IgK locus (gDNA)                          | 5'-AGAGACAGGAGGATCTGGTCTATAAAATGA-3'      |
| IgKJ5-rev             | IgK locus (gDNA)                          | 5'-CACCGAACGTGAGCCACAGTG-3'               |
| HEL23-VK-leader-for   | Spliced HEL23 antibody construct (cDNA)   | 5'-GGTGCAGATTTTCAGCTTC-3'                 |
| HyHEL10-VK-leader-for | Spliced HyHEL10 antibody construct (cDNA) | 5'-TTTCACACCTCAGATACTTGG-3'               |
| 2G4-VK-leader-for     | Spliced 2G4 antibody construct (cDNA)     | 5'-GTGTGCCCACTCAGGTC-3'                   |
| 4G7-VK-leader-for     | Spliced 4G7 antibody construct (cDNA)     | 5'-CCTGGGGTTGCTGCTG-3'                    |
| IgG2C-rev             | Spliced antibody constructs (cDNA)        | 5'-GTTGTACCTCCACACACAG-3'                 |

Primers utilized for PCR on genomic DNA and RNA/cDNA.
